# Supplementary material
Source: Springer Nature journal article supplement (https://www.springermedizin.de/resource/supplementary/12885_2008_1528_MOESM5_ESM.pdf/9472246)

Relative Luciferase Activity (%)

Luc-CCND1-3'-UTR-2  
Luc-CCND1-3'-UTR-2-d

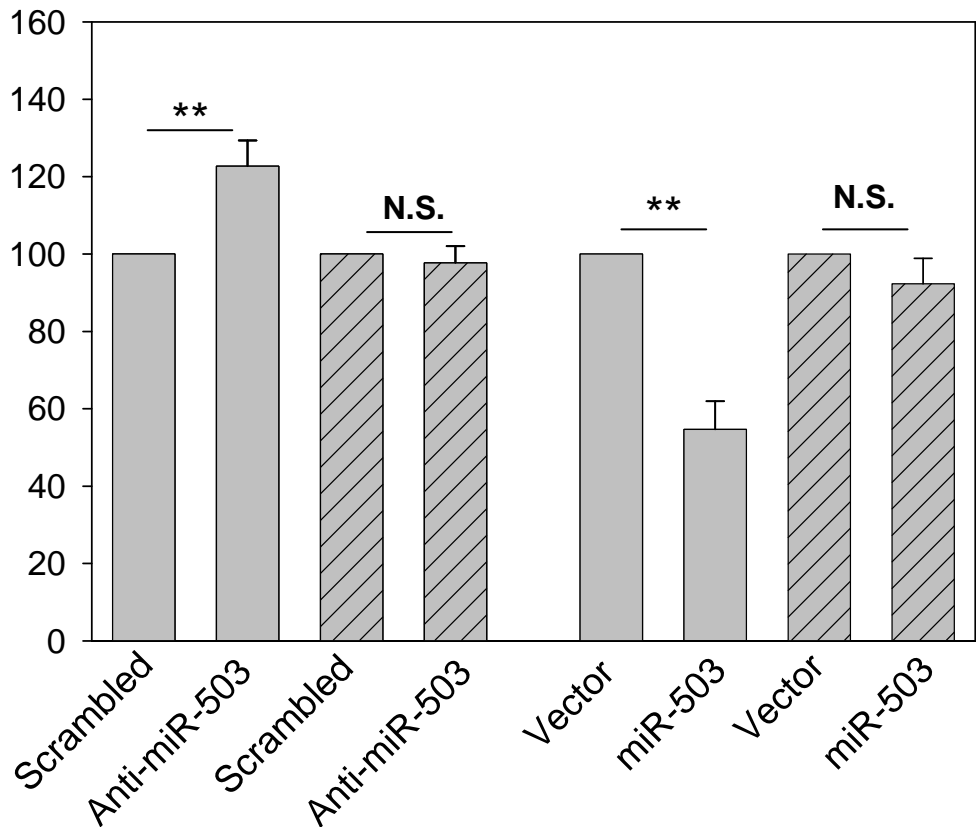

Supplement: MOESM5 [file 9472246]
